# Supplementary material for: EmbedDTI: Enhancing the Molecular Representations via Sequence Embedding and Graph Convolutional Network for the Prediction of Drug-Target Interaction
Source: MDPI journal article supplement (doi:10.3390/biom11121783), 2021-11-29
Supplement: s1 [file s1]

## Supplementary Materials

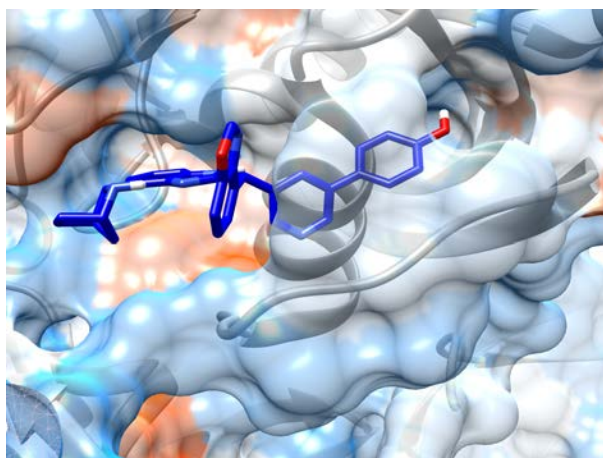

**Figure S1.** Visualization of the first candidate molecule binding into specific pocket in chain A of K-Ras.

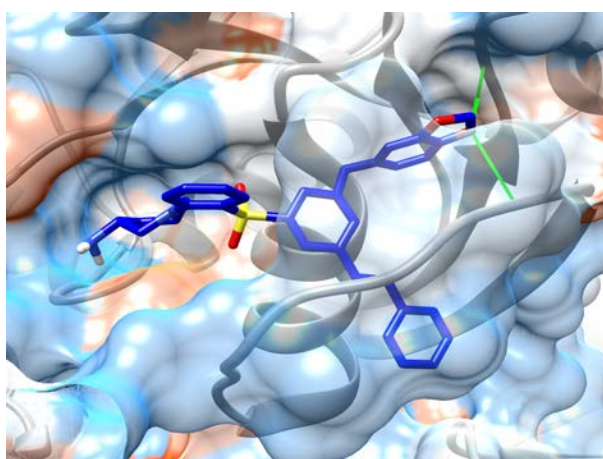

**Figure S2.** Visualization of the second candidate molecule binding into specific pocket in chain A of K-Ras. Hydrogen bonds are highlighted by green lines.

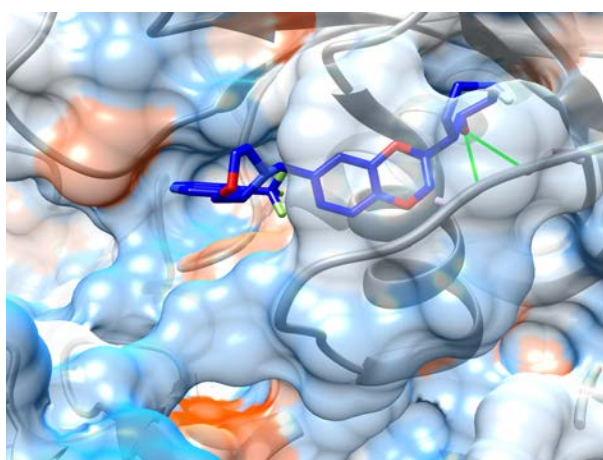

**Figure S3.** Visualization of the third candidate molecule binding into specific pocket in chain A of K-Ras. Hydrogen bonds are highlighted by green lines.

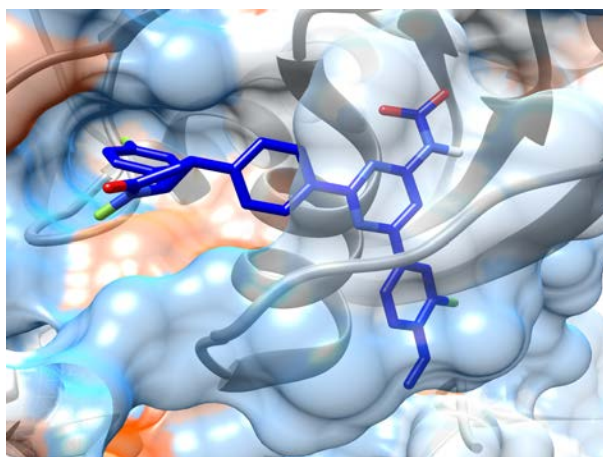

**Figure S4.** Visualization of the fourth candidate molecule binding into specific pocket in chain A of K-Ras. Hydrogen bonds are highlighted by green lines.

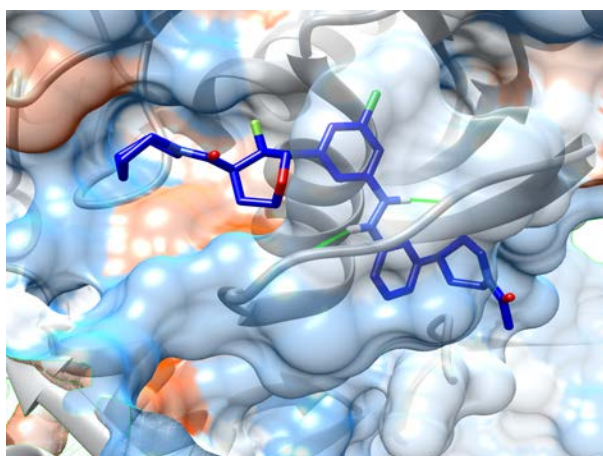

**Figure S5.** Visualization of the fifth candidate molecule binding into specific pocket in chain A of K-Ras. Hydrogen bonds are highlighted by green lines.

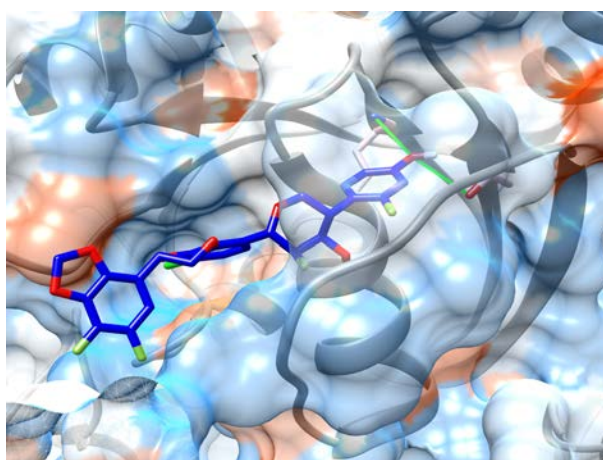

**Figure S6.** Visualization of the sixth candidate molecule binding into specific pocket in chain A of K-Ras. Hydrogen bonds are highlighted by green lines.

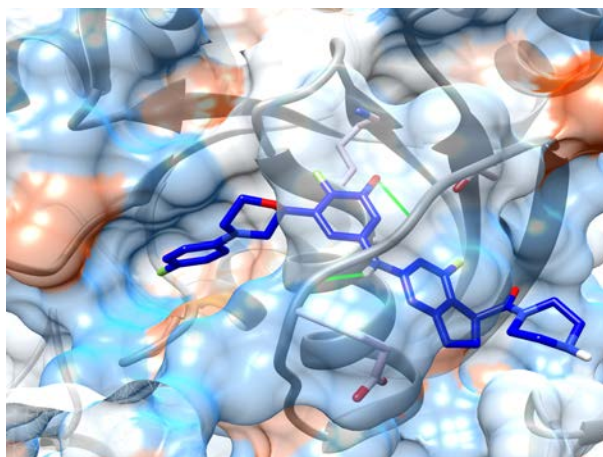

**Figure S7.** Visualization of the seventh candidate molecule binding into specific pocket in chain A of K-Ras. Hydrogen bonds are highlighted by green lines.

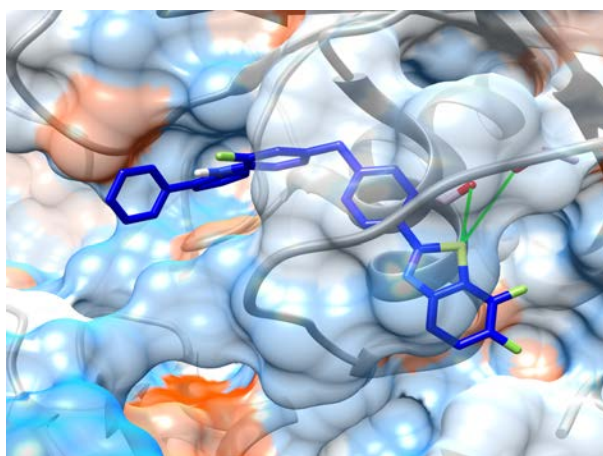

**Figure S8.** Visualization of the eighth candidate molecule binding into specific pocket in chain A of K-Ras. Hydrogen bonds are highlighted by green lines.

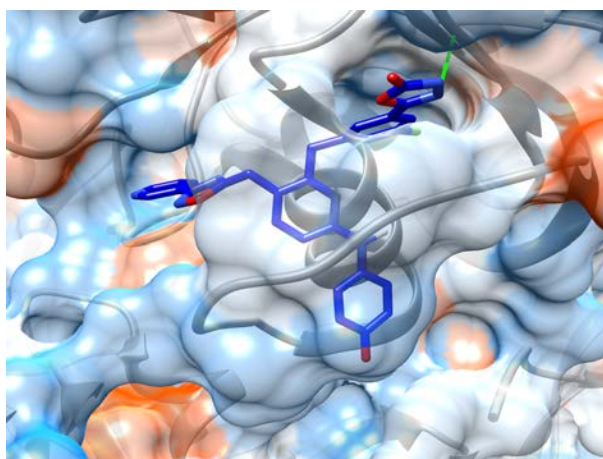

**Figure S9.** Visualization of the ninth candidate molecule binding into specific pocket in chain A of K-Ras. Hydrogen bonds are highlighted by green lines.



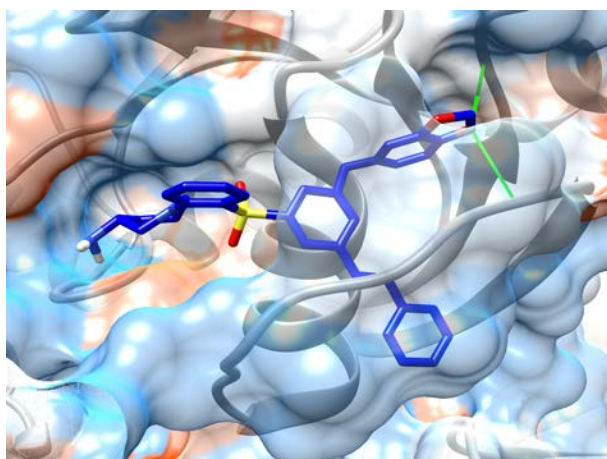

**Figure S10.** Visualization of the tenth candidate molecule binding into specific pocket in chain A of K-Ras. Hydrogen bonds are highlighted by green lines.
